# Supplementary material for: CCL5-Secreting Virtual Memory CD8+ T Cells Inversely Associate With Viral Reservoir Size in HIV‐1−Infected Individuals on Antiretroviral Therapy
Source: Front Immunol. 2022 May 26;13:897569. doi: 10.3389/fimmu.2022.897569 (PMC9204588; doi:10.3389/fimmu.2022.897569)
Supplement: Supplementary file 2 [file DataSheet_2.csv]

	p_val	avg_log2FC	pct.1	pct.2	p_val_adj
KLRC2	0	2.49481199254246	0.867	0.109	0
GZMB	0	2.45861543328416	0.823	0.148	0
FCGR3A	5.37233632148369e-306	1.85676862982999	0.638	0.075	8.30724365391022e-302
GZMH	5.41399745802337e-279	1.82066068359481	0.932	0.408	8.37166426934154e-275
NKG7	1.56790527478392e-259	1.24898740746432	1	0.912	2.42445192639837e-255
KLRD1	1.82548041326487e-258	1.51810434650452	0.913	0.367	2.82274036303147e-254
PRF1	4.7849893722654e-236	1.5204848716137	0.943	0.607	7.39902906633399e-232
GNLY	3.66626627063474e-230	2.24781000823563	0.73	0.194	5.6691475342825e-226
CTSW	4.56689141383481e-227	1.28222785307508	0.971	0.717	7.06178419321276e-223
ADGRG1	2.25082050803245e-222	1.43189392003342	0.635	0.136	3.48044375157057e-218
GZMK	2.4360209032281e-220	-2.0301498467319	0.259	0.825	3.76681912266162e-216
COTL1	1.33295652194619e-183	-1.48533946288418	0.357	0.843	2.06115066988539e-179
KLRB1	2.55357835703643e-181	1.46536235025477	0.589	0.127	3.94859821348543e-177
PRSS23	4.74588111113705e-181	1.05486007023785	0.426	0.049	7.33855596215123e-177
TRAV8-3	2.58413244421548e-180	1.65208419987862	0.536	0.11	3.99584399849039e-176
HOPX	1.65645870885045e-179	1.29368932980685	0.772	0.304	2.56138210149544e-175
FGFBP2	9.76571569605326e-176	1.78348034060377	0.668	0.231	1.51007261808072e-171
IL7R	1.0902911785294e-175	-1.69724428592723	0.311	0.804	1.68591724936002e-171
RPL39	1.52991814549123e-174	-0.461002370009407	1	1	2.36571242837308e-170
FCRL6	9.08151894042721e-171	1.1596804322195	0.705	0.238	1.40427527375826e-166
EFHD2	1.49816925293037e-163	1.19048933882675	0.661	0.227	2.31661911580624e-159
RPS15A	2.84774643751414e-160	-0.401671465090163	1	1	4.40347031632811e-156
RPL28	1.65365949191362e-153	-0.399483781691287	1	1	2.55705367234603e-149
RPL13	1.76910023608714e-153	-0.433056934447431	1	1	2.73555969506155e-149
TRGV8	1.1118257161943e-149	1.27376969241938	0.441	0.077	1.71921610495125e-145
S1PR5	2.21689413921935e-146	1.09311860712034	0.703	0.267	3.42798340747488e-142
CD27	1.80300174271792e-145	-1.37416649086004	0.036	0.506	2.78798159476473e-141
HLA-C	4.54924143651022e-143	0.409068836126294	1	1	7.03449203327576e-139
RPS8	8.54029881584436e-136	-0.455913020036611	1	1	1.32058640589401e-131
RPS12	4.2524048559311e-134	-0.43773602551988	1	1	6.57549362872626e-130
LGALS1	1.20697565717467e-132	1.37238591854794	0.742	0.36	1.86634645868919e-128
RPS28	8.95206815964104e-130	-0.40979892118681	1	1	1.38425829952529e-125
TTC38	9.47900794664642e-130	1.0076121868221	0.436	0.096	1.46573899878994e-125
RPL32	8.38556995838738e-128	-0.425939762054822	1	1	1.29666068266544e-123
EEF1A1	9.07645008061198e-127	-0.322196962835313	1	1	1.40349147596503e-122
TRBV6-5	3.39485621599289e-126	1.61066686104649	0.372	0.06	5.24946616678981e-122
KLRF1	1.16137841248231e-125	1.00398414027024	0.315	0.038	1.79583943922139e-121
RPS18	1.70088831760218e-124	-0.444858363510101	1	1	2.63008360550825e-120
RPS25	4.29205601683246e-122	-0.403481784144817	1	1	6.63680621882803e-118
CST7	8.31352000277054e-122	0.740726339564012	1	0.87	1.28551959802841e-117
RPL41	9.36280685881895e-121	-0.30551822583509	1	1	1.44777082457917e-116
RPL34	2.59335382455764e-120	-0.376659141603791	1	1	4.01010301891348e-116
RPL11	4.20555001951602e-118	-0.388493957396669	1	1	6.50304199517762e-114
RPL36	3.04660609500251e-117	-0.436965987590639	0.999	0.999	4.71096700470239e-113
RPLP0	1.55624858929942e-116	-0.578606770294001	0.998	0.999	2.40642719363369e-112
KIR2DL1	2.39206889375399e-116	0.809511684373681	0.209	0.005	3.6988561304118e-112
KLRC3	3.38174781361808e-116	0.719188133463569	0.278	0.028	5.22919664419763e-112
LTB	6.47021486779716e-116	-1.85678912935069	0.231	0.604	1.00048932500747e-111
SELL	2.15522726246495e-115	-1.48637726229343	0.087	0.498	3.33262791594955e-111
IFITM2	7.50076050709109e-115	0.953480123902834	0.937	0.826	1.1598425972115e-110
RPS23	2.44376477601586e-114	-0.380906480187059	1	1	3.77879347315332e-110
CCL5	1.52941989283069e-112	0.533623169478618	1	0.983	2.3649419802841e-108
RPLP1	8.65511526320958e-112	-0.467359692163805	1	1	1.3383404731501e-107
RPL30	1.35335025761991e-111	-0.340537592989353	1	1	2.09268550335767e-107
SARAF	2.57119582390483e-108	-0.711909032564664	0.919	0.97	3.97584010250404e-104
RPL19	1.17590024667489e-106	-0.346571222719961	1	1	1.81829455143338e-102
RPS13	8.33832663804436e-103	-0.445784575462143	1	1	1.2893554480408e-98
TRAV13-2	1.98607304749985e-101	1.44911497669437	0.367	0.085	3.07106475334902e-97
OSBPL5	2.06887148674939e-97	0.656698782948888	0.268	0.037	3.19909597996058e-93
RPL18A	2.21341643869675e-97	-0.345197756358443	1	1	3.42260583915679e-93
LILRB1	2.45378983714644e-94	0.65025746907597	0.226	0.022	3.79429522517955e-90
FGR	1.90617693008785e-93	0.831380003321571	0.525	0.192	2.94752138699485e-89
KLRC4	2.70339460407932e-93	0.814356600601688	0.544	0.212	4.18025907628785e-89
NCR1	4.99909605297975e-92	0.609672278204452	0.192	0.012	7.73010222672259e-88
RPL10	2.99788968411422e-89	-0.307835885452514	1	1	4.63563681854582e-85
LSP1	1.32543592172468e-88	0.552581482228029	0.98	0.916	2.04952156576287e-84
KLRG1	6.63274197787723e-87	0.799008749626259	0.761	0.447	1.02562089203916e-82
KIR3DL2	8.592756697279e-87	0.769151894317192	0.204	0.019	1.32869796810025e-82
RPL12	2.15900292522234e-86	-0.371772608936514	1	1	3.3384662232713e-82
CFL1	7.17344165519315e-86	0.485167755067897	1	0.991	1.10922928314252e-81
SH3BGRL3	2.23175824501238e-85	0.482373767191387	0.998	0.995	3.45096777426265e-81
TCF7	9.83379563294214e-85	-0.994649565522119	0.182	0.539	1.52059981872184e-80
KIR2DL3	1.96898134658725e-84	0.664458288650969	0.156	0.005	3.04463585622786e-80
RPL35A	8.04609716114558e-84	-0.32992371452257	1	1	1.24416800402794e-79
ZEB2	3.44579783134122e-83	0.797225562723535	0.649	0.326	5.32823718660294e-79
ITGAM	1.14374614305864e-82	0.675562291788926	0.291	0.061	1.76857466101157e-78
S100A4	5.02302577274097e-82	0.693102843590782	0.981	0.889	7.76710475238937e-78
NELL2	2.68419512052351e-81	-1.03003311667003	0.026	0.332	4.1505709148655e-77
RPS21	5.7243700891891e-81	-0.31851246981996	1	1	8.85159346891311e-77
KIR3DL1	2.12943278631775e-80	0.665001042215485	0.156	0.006	3.29274191748313e-76
RPS5	9.93605113644607e-80	-0.419089251381927	0.996	0.999	1.53641158722866e-75
CX3CR1	1.47219390820378e-79	0.638671492903735	0.285	0.059	2.27645344025551e-75
TYROBP	7.88804124947615e-78	1.52638172370527	0.161	0.009	1.2197278184065e-73
CCL4	1.64850655050517e-77	0.693539951906418	0.805	0.453	2.54908567904614e-73
RPL8	6.99363423218272e-77	-0.346832020614881	1	1	1.08142566132241e-72
RPL5	3.08832383705885e-76	-0.384533576475202	1	1	4.7754751492441e-72
RPS3A	4.12303038841232e-76	-0.313185634394091	1	1	6.37544188960197e-72
C1orf21	9.14257222038969e-76	0.728294575264153	0.47	0.182	1.41371594243886e-71
TRBV10-3	1.40034179596811e-75	2.18435368508911	0.186	0.019	2.16534851910549e-71
NCR3	4.78202448543352e-75	0.736797529819675	0.35	0.106	7.39444446182584e-71
JUNB	3.45483682981386e-73	-0.819509174066589	0.799	0.919	5.34221418994118e-69
CD63	3.6242552479734e-73	0.784321029513863	0.603	0.326	5.60418588994127e-69
RHOC	3.80545022189136e-73	0.791693441174479	0.498	0.214	5.88436767811061e-69
LDHB	1.48362044665277e-72	-0.714446389916953	0.753	0.864	2.29412229665918e-68
RPL9	8.76485892621721e-72	-0.371452882365883	0.999	1	1.35531013576097e-67
IKZF2	2.5036937219154e-70	0.579517502976376	0.193	0.026	3.87146160219778e-66
RPL14	1.28532353477409e-69	-0.321000687884571	1	1	1.98749578182118e-65
TRG-AS1	2.34994214479538e-69	0.775304953986897	0.545	0.273	3.63371553849709e-65
IFITM1	6.16361816877421e-69	0.496673317765514	0.994	0.987	9.53080277437555e-65
HCST	7.68576170190504e-69	0.50776553211635	0.994	0.962	1.18844933196558e-64
RPL18	2.08266974208536e-68	-0.30439827669502	1	1	3.22043222218659e-64
MYOM2	3.16761073583409e-68	0.742834283120425	0.155	0.012	4.89807648082026e-64
LEPROTL1	8.03955018509167e-66	-0.705354642751595	0.541	0.782	1.24315564512072e-61
ACTB	1.31609845663713e-65	0.487852104188306	1	1	2.03508304349799e-61
RPLP2	4.74563911194321e-65	-0.309710515930573	1	1	7.33818175879779e-61
CLDND1	2.57922593764999e-64	-0.94882876029382	0.269	0.564	3.98825706738819e-60
RPL4	2.6538989084168e-62	-0.410393485301044	0.987	0.994	4.1037238820849e-58
PFN1	3.02449342268242e-62	0.382896252363071	1	0.999	4.67677417949383e-58
HINT1	3.08177870332908e-62	-0.544500267263339	0.845	0.937	4.76535440895776e-58
CD28	3.3952662088153e-62	-0.679769581077479	0.01	0.247	5.2501001386911e-58
CNN2	3.52218609499903e-62	-0.681398189199395	0.649	0.84	5.44635635869699e-58
LYN	5.87625039785733e-62	0.414083827807237	0.151	0.015	9.0864459902068e-58
CYBA	5.8743868327086e-61	0.57017734506864	0.959	0.891	9.08356435941731e-57
RPL22	2.16392077393918e-60	-0.362462210397701	0.995	0.997	3.34607069274215e-56
TBX21	2.59592195069411e-60	0.652076010009948	0.399	0.158	4.01407411235831e-56
AOAH	4.90353304625927e-60	0.664300788894841	0.433	0.179	7.58233314943071e-56
RACK1	1.70170122440897e-59	-0.324862627582265	0.996	1	2.63134060330359e-55
RPL10A	5.42300519628639e-59	-0.341262787810069	0.999	0.998	8.38559293501764e-55
PLEKHF1	7.15988248822852e-57	0.551752343042761	0.255	0.068	1.10713262915478e-52
TRAV12-3	1.68738184169849e-56	1.20304449044549	0.179	0.03	2.60919854181837e-52
SYNGR1	3.93510776972627e-56	0.576605025078644	0.207	0.044	6.08485714432774e-52
RPSA	5.56144355655407e-56	-0.320907295891502	0.999	1	8.59966017149956e-52
CCR7	3.7074414164824e-55	-0.765777982800489	0.014	0.232	5.73281666230674e-51
LINC02384	2.16198808048546e-54	0.50796706363262	0.207	0.045	3.34308216885466e-50
CD300A	4.29946843335111e-54	0.644400431647738	0.415	0.185	6.64826803849082e-50
ZNF683	3.94684691672211e-53	0.949978231007999	0.264	0.08	6.10300938732739e-49
S100A6	4.01006272714782e-53	0.452388097318803	0.975	0.948	6.20075999498867e-49
CALM1	4.10611270357839e-53	0.376157773441239	0.995	0.991	6.34928207354326e-49
ARPC2	5.61603881867669e-53	0.46556523878848	0.953	0.901	8.68408082531977e-49
ITGB2	5.46007183184888e-52	0.476518331433639	0.958	0.901	8.44290907358792e-48
CEP78	7.89738747492273e-52	0.599550549645286	0.325	0.119	1.2211730252473e-47
CD5	1.01470897228124e-51	-0.742326896531057	0.289	0.557	1.56904448383848e-47
PAG1	3.21619000049398e-51	-0.675210595552793	0.092	0.335	4.97319459776384e-47
XCL2	4.05588582914641e-51	0.582532509495353	0.319	0.112	6.27161625760910e-47
TNFAIP3	1.02123047141973e-50	-0.670932335569265	0.76	0.895	1.57912867795633e-46
EEF2	4.2499932501843e-50	-0.344196039548351	0.988	0.994	6.57176456275998e-46
C12orf75	1.74719008541734e-49	0.584452074378416	0.75	0.544	2.70168002908083e-45
CLIC1	6.36789762325332e-49	0.508352027339587	0.916	0.803	9.84668009483661e-45
LITAF	1.01105267092996e-48	0.481758256797678	0.946	0.857	1.563390745059e-44
SLC9A3R1	1.65687456398376e-48	0.564211483040072	0.814	0.637	2.56202513828809e-44
PTMS	4.60632969689867e-48	0.562864094612044	0.334	0.129	7.12276761031442e-44
GPR183	1.86411408282649e-47	-0.607240808924971	0.025	0.225	2.88247960627461e-43
CD8A	2.54308379253084e-47	0.426662052987584	0.975	0.972	3.93237046839044e-43
CD6	2.77527720974111e-47	-0.68249516376237	0.358	0.599	4.29141114942268e-43
CD99	3.99701521491126e-47	0.379580694034284	0.98	0.948	6.18058462681728e-43
RCAN3	6.29140274849144e-47	-0.566380468818956	0.013	0.204	9.72839606999232e-43
BTG1	6.05935968712054e-46	-0.41031634600433	0.974	0.988	9.36958788419448e-42
CCL4L2	2.1741943439739e-45	0.632433125761538	0.466	0.233	3.36195671408684e-41
EEF1B2	2.40577104346536e-45	-0.388197075408177	0.986	0.989	3.72004376451049e-41
SH2D2A	8.38855550068706e-45	0.656441796112053	0.619	0.401	1.29712233707124e-40
HLA-B	1.13313673814824e-44	0.308248753729024	1	1	1.75216933819862e-40
APMAP	2.07343184348591e-44	0.54894297956534	0.686	0.474	3.20614765958226e-40
RAP1B	5.1483870756894e-44	0.52326201597989	0.819	0.688	7.96095093513852e-40
GZMA	5.56218660385961e-44	0.417722928746032	0.966	0.821	8.60080914554812e-40
ZFP36L2	9.92372071575109e-44	-0.410606792162561	0.979	0.989	1.53450493427659e-39
GAS5	1.15756772094917e-43	-0.545908463556556	0.661	0.817	1.7899469669037e-39
ADAM8	2.60357644229078e-43	0.585821795831988	0.568	0.346	4.02591025271423e-39
MYL6	8.86007782044017e-43	0.368089316170311	0.986	0.967	1.37003383337466e-38
PPP1R18	1.62007540267879e-42	0.548080676719658	0.669	0.473	2.50512259516222e-38
MATK	2.74667495031951e-42	0.534186125765546	0.662	0.448	4.24718347567906e-38
PLEK	2.85321694209238e-42	0.557957411970199	0.638	0.403	4.41192935755744e-38
BIN2	5.22141995443909e-42	0.46393812206777	0.856	0.724	8.07388167554916e-38
RPL36A	2.52270625936278e-41	-0.307133174927582	0.995	0.996	3.90086068885267e-37
ABI3	4.77878852461553e-41	0.52946894219365	0.386	0.18	7.389440695613e-37
SPN	1.67683301922675e-40	0.553598068587269	0.573	0.365	2.59288689763033e-36
SNHG29	5.64216808387078e-40	-0.503043933399048	0.783	0.871	8.72448450808939e-36
CD244	1.22657029350952e-39	0.496061371930632	0.291	0.115	1.89664564485377e-35
MCUB	5.39836252290942e-39	-0.551963316167035	0.381	0.61	8.34748796917483e-35
CHST12	6.82074381294427e-39	0.537949374764635	0.49	0.286	1.05469161579557e-34
PDGFD	7.62054230898489e-39	0.31194330946997	0.131	0.023	1.17836445723833e-34
TGFBR3	4.80502356385059e-38	0.540708280706776	0.469	0.265	7.43000793678217e-34
DUSP2	1.26926683177428e-37	-0.471162370511846	0.796	0.915	1.96266730197258e-33
TSPAN32	1.55097975960615e-37	0.548661192695951	0.505	0.304	2.39828000227899e-33
FAM102A	4.24002699893209e-37	-0.478874809516774	0.045	0.226	6.5563537484487e-33
PTGDR	1.40188320169496e-36	0.440122184785356	0.224	0.076	2.16773199478092e-32
FLNA	2.17351255324659e-36	0.433560226070029	0.916	0.84	3.36090246108521e-32
PLEKHG3	2.39187208817074e-36	0.39193058345643	0.185	0.054	3.69855180993842e-32
CTSC	9.63562897518339e-36	0.472018721182991	0.736	0.557	1.48995730843261e-31
TUBA1B	1.8475230485132e-35	0.365385969449409	0.714	0.52	2.85682488991597e-31
MYO1G	1.93997466171529e-35	0.479076642089378	0.734	0.555	2.99978281941035e-31
CAMK4	1.98574347666409e-35	-0.562026927433003	0.184	0.396	3.07055513796569e-31
PIK3AP1	2.81860204820354e-35	0.368888538765353	0.152	0.037	4.35840434713714e-31
UBB	3.33656196471006e-35	0.400991891523044	0.945	0.886	5.15932576603116e-31
CTSD	4.07165341605821e-35	0.497680606306528	0.631	0.459	6.29599767725081e-31
TRGV2	4.15419436815418e-35	0.896482353341034	0.324	0.156	6.4236307514768e-31
BHLHE40	5.03159526466448e-35	0.519318246756472	0.523	0.316	7.78035575775069e-31
RGS10	6.74935934315627e-35	-0.559218706068172	0.348	0.554	1.04365343523225e-30
FLT3LG	8.4862665653897e-35	-0.572696622934705	0.288	0.5	1.31223139900621e-30
RHOH	1.83423945298831e-34	-0.558995839115608	0.477	0.667	2.83628446615582e-30
TPM3	3.10622372562207e-34	0.377632022950875	0.937	0.878	4.80315374692941e-30
FTH1	1.15507537996743e-33	-0.427785627759718	0.995	0.997	1.78609306004364e-29
CD320	1.22021251716392e-33	0.491679401706337	0.309	0.143	1.88681461529057e-29
AIF1	2.62104456505435e-33	-0.40945257472764	0.005	0.14	4.05292121094353e-29
PIK3IP1	3.07848627566173e-33	-0.56990197858461	0.404	0.606	4.76026332805574e-29
SPON2	3.32996768786175e-33	0.613253122359857	0.37	0.194	5.14912903574063e-29
DHRS7	3.73022563441895e-33	0.477048057587459	0.612	0.436	5.76804789850202e-29
CD82	4.00349553459335e-33	-0.463715544822536	0.046	0.21	6.1906051451417e-29
FTL	8.25975593078902e-33	0.30049786827094	1	0.993	1.27720605957791e-28
NPM1	8.66947678687112e-33	-0.336876903020396	0.931	0.954	1.34056119555388e-28
CD247	8.78016737077943e-33	0.472892267473124	0.73	0.587	1.35767728054362e-28
PASK	4.49716706461279e-32	-0.464113965739654	0.01	0.145	6.95396943201076e-28
PTPN12	4.82559907312049e-32	0.344916230829288	0.161	0.046	7.46182384676621e-28
CD160	6.42424781292222e-32	0.545866557277739	0.306	0.141	9.93381439312162e-28
LINC00944	9.87805458802272e-32	0.392462230681404	0.204	0.071	1.52744358094595e-27
GSTP1	1.70183166623503e-31	0.3820261929241	0.818	0.693	2.63154230549923e-27
DNAJB1	2.2293570644141e-31	-0.493811148398993	0.606	0.761	3.44725482870353e-27
PDE4A	3.03369848628696e-31	0.309171633345531	0.128	0.03	4.69100796934552e-27
ARPC5L	3.57019022681258e-31	0.452341267070329	0.602	0.427	5.52058514772029e-27
DSTN	4.47395612460168e-31	0.502555962104111	0.486	0.313	6.91807835547157e-27
JAML	4.58645690902154e-31	-0.385010646842755	0.017	0.154	7.09203831842001e-27
MYO1F	4.73620649966639e-31	0.46352572721404	0.63	0.451	7.32359611043414e-27
GNG2	8.42696908063347e-31	0.473846955092176	0.64	0.477	1.30306222893835e-26
MT-ND1	2.92887092003303e-30	-0.307482029869597	0.994	0.996	4.52891310364708e-26
MYL12B	3.53400758680446e-30	0.317734080310967	0.954	0.92	5.46463593147574e-26
SIRPG	3.80733282109098e-30	-0.422229591446027	0.048	0.205	5.88727874125298e-26
PSAP	4.11853523060901e-30	0.428993432213221	0.715	0.575	6.36849102709071e-26
UBE2F	4.26913408509431e-30	0.45593047330364	0.404	0.231	6.60136203578133e-26
ADRB2	4.38924872593325e-30	0.366969455665464	0.195	0.069	6.78709530491059e-26
FUT11	5.34007675700706e-30	0.369082213422856	0.22	0.084	8.25736068936002e-26
IFITM3	6.22208379841496e-30	0.474209892936236	0.682	0.533	9.62120817748905e-26
RHOA	6.8907344765653e-30	0.327182856101044	0.955	0.923	1.06551427211129e-25
TUBB	8.46481813530344e-30	0.386522228176786	0.719	0.576	1.30891482826197e-25
ACTN4	2.36046896003828e-29	0.453417551804719	0.525	0.343	3.64999315290719e-25
ABHD17A	2.86072908664233e-29	0.466616453044888	0.417	0.245	4.42354538667504e-25
RASSF1	2.88268095855958e-29	0.490414535501053	0.511	0.335	4.45748956622068e-25
CLIC3	3.20614845307317e-29	0.544248445034282	0.393	0.224	4.95766735298704e-25
RIC3	9.08721398182016e-29	-0.38231539827027	0.023	0.157	1.40515589800885e-24
DOK2	1.15760674301075e-28	0.439944174361023	0.558	0.378	1.79000730671752e-24
CD69	2.13397219674406e-28	-0.419841872830722	0.575	0.755	3.29976120782534e-24
TSPO	5.45893842290159e-28	-0.468064229571093	0.249	0.448	8.44115648333273e-24
PER1	9.3520611899377e-28	-0.473229747541985	0.203	0.395	1.44610922180007e-23
HNRNPLL	1.12825153245021e-27	-0.454293553551736	0.068	0.219	1.74461534462776e-23
AQP3	1.51885513927036e-27	-0.429642217790996	0.041	0.182	2.34860570185376e-23
TNFRSF25	2.32771176465007e-27	-0.318080190453734	0.007	0.121	3.59934070167841e-23
CAP1	2.33118033198989e-27	0.385120917328894	0.829	0.719	3.60470414735597e-23
ITM2C	2.55924730583829e-27	-0.373453399672446	0.011	0.129	3.95736410901775e-23
CD3G	3.88730104330216e-27	0.398265618564064	0.787	0.681	6.01093360325813e-23
SASH3	6.23229411833295e-27	0.444233749266141	0.597	0.43	9.63699639517825e-23
DNAJC1	6.35555392911446e-27	0.444864522839787	0.47	0.301	9.82759304058969e-23
TAGAP	7.59994821413946e-27	-0.527521049655514	0.353	0.54	1.17517999235238e-22
SEPTIN7	9.66245005723953e-27	0.385171826702245	0.795	0.684	1.49410465235095e-22
CRIP1	9.71167014768168e-27	0.395708250530673	0.901	0.822	1.50171555493602e-22
GLUL	1.2630217134038e-26	0.404430412276415	0.277	0.134	1.95301047543629e-22
APOBEC3G	2.05913980562303e-26	0.475569624532459	0.508	0.35	3.1840478814349e-22
SCP2	2.31820382174426e-26	0.434698462806917	0.586	0.434	3.58463856956315e-22
GNPTAB	1.91059067091665e-25	0.401600525574924	0.313	0.167	2.95434635443842e-21
SH3BP2	1.9606861709451e-25	0.385144812142508	0.295	0.149	3.0318090261324e-21
SRGN	2.33794459108321e-25	0.303457882553604	0.979	0.956	3.61516372119197e-21
DGKA	2.5186656168589e-25	-0.469407806270224	0.179	0.352	3.89461264334892e-21
ITGAL	3.54816169673611e-25	0.447924913449567	0.655	0.521	5.48652243166304e-21
FAM49B	4.20286453989738e-25	0.428883711978787	0.617	0.477	6.49888943804332e-21
TRGV7	4.65080581978302e-25	0.363228203069009	0.187	0.07	7.19154103913048e-21
LINC01550	6.95758634278126e-25	-0.339531520581961	0.036	0.162	1.07585157618427e-20
SKAP2	7.35409138249409e-25	0.317116268645505	0.167	0.06	1.13716315047506e-20
AGTRAP	2.41845232078839e-24	0.361219797610818	0.306	0.163	3.73965282363509e-20
SNHG8	2.80735853058513e-24	-0.439176567855586	0.381	0.562	4.34101849584379e-20
SSBP3	3.8326945388158e-24	0.353098679019434	0.22	0.097	5.92649556537087e-20
LDLRAP1	6.70431720638808e-24	-0.420550502805062	0.146	0.308	1.03668856962379e-19
NPDC1	7.62965977902266e-24	-0.384799185236858	0.037	0.16	1.17977429163027e-19
NSG1	9.87460861198761e-24	-0.357913622057326	0.046	0.177	1.52691072967164e-19
SUB1	1.08100829209707e-23	0.31925740991662	0.893	0.822	1.6715631220697e-19
TRGC2	1.1743700752669e-23	0.407710961756981	0.284	0.148	1.81592844738521e-19
TPST2	1.20390745537663e-23	0.409483021497298	0.566	0.413	1.86160209824888e-19
PPP1CA	1.23544490062113e-23	0.331245613589029	0.827	0.724	1.91036844983045e-19
SNHG6	1.50362655272785e-23	-0.343757379981607	0.798	0.877	2.32505773848307e-19
SYTL3	1.74619347611621e-23	0.401529078746083	0.395	0.24	2.70013897211849e-19
STOM	2.20953500778303e-23	0.404686603636649	0.576	0.42	3.4166039825349e-19
MSN	2.73691108667638e-23	0.360604457087041	0.819	0.762	4.23208561332769e-19
TPI1	3.37707704964546e-23	0.363282148022811	0.747	0.623	5.22197424186677e-19
EMP3	4.78943967476908e-23	0.325473235448789	0.951	0.898	7.40591056909542e-19
CAPN2	1.02068995713077e-22	0.369368713260617	0.697	0.561	1.57829288071131e-18
CDK2AP2	1.03748132293599e-22	0.430241386760624	0.481	0.322	1.60425736965593e-18
LCP1	1.05932251685131e-22	0.33024594050214	0.908	0.849	1.63803040780718e-18
P2RY8	1.48047712004932e-22	-0.39931659969707	0.518	0.682	2.28926177073226e-18
C11orf21	1.61020372303052e-22	0.412309705879567	0.338	0.199	2.4898580169221e-18
TUBB4B	1.86869750250815e-22	0.379512657013966	0.377	0.225	2.88956694812836e-18
TNFSF8	2.21597765134675e-22	-0.330265799474727	0.044	0.168	3.42656624227749e-18
TRAT1	2.40152578741845e-22	-0.395227811480251	0.153	0.315	3.71347932508514e-18
LEF1	3.66146501102921e-22	-0.472898589211181	0.083	0.217	5.66172334655447e-18
ANXA2	3.81414867320475e-22	0.398925625648804	0.573	0.418	5.89781809337651e-18
RGS1	5.56229830927627e-22	-0.578564987591868	0.16	0.318	8.6009818756339e-18
NDUFB7	7.87540011295333e-22	0.374416748743251	0.558	0.413	1.21777311946597e-17
DBI	8.6068158953865e-22	0.344429641819423	0.704	0.581	1.33087194190361e-17
FXYD2	1.03284682766577e-21	-0.395269719308913	0.01	0.105	1.59709104961958e-17
FXYD5	1.49739149222344e-21	-0.305362088083846	0.927	0.941	2.31541646442511e-17
CALR	2.560520338584e-21	0.402509571369563	0.827	0.756	3.95933259955244e-17
PDCD1	2.79574473492178e-21	-0.328333216498215	0.013	0.109	4.32306008360955e-17
HSH2D	3.79518460728974e-21	0.39541499423941	0.304	0.174	5.86849395825213e-17
RUNX3	5.09321477884904e-21	0.386012140457654	0.635	0.498	7.87563801253426e-17
PCED1B-AS1	7.89669798771367e-21	-0.339845710636475	0.826	0.899	1.22106640984016e-16
TMEM123	8.06527147695278e-21	-0.448948693149489	0.294	0.446	1.24713292848121e-16
PIM3	1.22428010396715e-20	-0.434515805650351	0.184	0.338	1.89310432476441e-16
PDIA3	1.23813309078621e-20	0.355027385800534	0.797	0.699	1.91452519828272e-16
DUSP1	1.77978169850255e-20	-0.366468618441934	0.538	0.718	2.75207644039449e-16
C5orf56	1.97278520757035e-20	0.385344841870153	0.447	0.298	3.05051776646604e-16
IER2	2.78385197948378e-20	0.350243517468662	0.777	0.651	4.30467031587577e-16
HMGN3	4.22594673870569e-20	0.368482531196395	0.527	0.389	6.53458144206061e-16
PLAAT3	4.30773074173768e-20	0.317396303865201	0.24	0.12	6.66104404594897e-16
CD52	4.69248352314992e-20	0.407753766452216	0.937	0.973	7.25598727184672e-16
IL2RB	4.79467367389594e-20	0.382472880103752	0.512	0.374	7.41400390194529e-16
F2R	5.27718825688987e-20	0.355652105509874	0.355	0.214	8.16011620162881e-16
CALHM2	6.02665272541739e-20	0.31309018263302	0.195	0.09	9.31901310931291e-16
ITGB7	8.73963750899212e-20	0.352133003193551	0.679	0.566	1.35141014801545e-15
GNG5	9.22918547410776e-20	0.355515938078276	0.633	0.511	1.42710894986128e-15
NFKBIZ	1.16155173172241e-19	-0.402676494413145	0.176	0.331	1.79610744276236e-15
ID2	1.85096349458235e-19	0.397086506648798	0.435	0.292	2.86214485167269e-15
RAB1B	2.96559152989823e-19	0.330147013273244	0.57	0.429	4.58569418268164e-15
SYNE1	3.48835249271642e-19	0.366845795516357	0.603	0.464	5.3940394594874e-15
INPP4B	6.55912522783988e-19	-0.416475646597535	0.179	0.323	1.01423753398088e-14
LPCAT1	7.02579474985073e-19	0.334617142599585	0.312	0.182	1.08639864216942e-14
ARL6IP5	8.33765961695572e-19	0.32650964893455	0.787	0.697	1.28925230656986e-14
VIM	9.72711729385591e-19	-0.359671256695944	0.905	0.938	1.50410414714894e-14
CREM	9.87013719663015e-19	-0.418864743618497	0.212	0.362	1.52621931471492e-14
OSTF1	1.03333664591316e-18	0.33696191901262	0.554	0.423	1.59784845557552e-14
C12orf57	1.06253732145825e-18	-0.334393362894641	0.775	0.862	1.64300146017089e-14
ARPC4	1.17361413294155e-18	0.325772801929173	0.744	0.652	1.81475953376752e-14
BATF	1.63006646644537e-18	0.308048112326505	0.221	0.112	2.52057177706447e-14
PAXX	4.24300834754229e-18	0.324433895302153	0.85	0.778	6.56096380780464e-14
ATF7IP2	5.08778314847813e-18	-0.330245314686751	0.097	0.221	7.86723908249172e-14
RAB29	5.61105397782542e-18	0.358468676236813	0.464	0.327	8.67637276591145e-14
MAPK1	8.91424182576619e-18	0.350415155149076	0.262	0.149	1.37840921351823e-13
PBXIP1	1.33660871219702e-17	-0.383708212650742	0.331	0.494	2.06679805167025e-13
MIDN	2.05245759010495e-17	0.33452074246582	0.31	0.184	3.17371517157928e-13
HLA-DRB5	2.31658329762725e-17	0.302665668125322	0.668	0.514	3.58213275312102e-13
RIN3	2.93004586405929e-17	0.34567806597456	0.302	0.184	4.53072991959488e-13
VASP	3.23893157538425e-17	0.33489788572539	0.493	0.359	5.00835989501667e-13
SATB1	3.55862145646266e-17	-0.348218207929032	0.132	0.262	5.50269635812821e-13
FAM53B	3.8395765621227e-17	0.326452964056984	0.261	0.148	5.93713723801033e-13
EIF3E	4.12429661742562e-17	-0.322108164546372	0.68	0.767	6.37739985952523e-13
ACTR3	5.75373249902242e-17	0.351383187376795	0.656	0.56	8.89699656323838e-13
SLA2	6.02221919543095e-17	0.427889199399632	0.383	0.263	9.31215754189488e-13
XCL1	6.10153121547006e-17	0.30597520746177	0.16	0.07	9.43479771848136e-13
NUCB1	7.5486803056898e-17	0.336425211356784	0.534	0.407	1.16725243566881e-12
SERPINB6	1.47655133661725e-16	0.306643453390944	0.186	0.092	2.28319133181126e-12
CAST	1.69325227261092e-16	0.343642452039525	0.625	0.506	2.61827598913826e-12
PLAC8	1.96844579354457e-16	0.37720320332908	0.422	0.293	3.04380773055796e-12
APOBEC3C	1.98713282442581e-16	0.340393745736537	0.342	0.217	3.07270348640963e-12
BTN3A2	2.24609083840158e-16	0.356699670741438	0.635	0.546	3.47313026342036e-12
LINC02446	2.28705095236915e-16	0.386219989788828	0.429	0.289	3.53646688764841e-12
TTC39C	2.86769388411127e-16	-0.342628612934093	0.183	0.32	4.43431505300125e-12
MFSD10	3.22779201793441e-16	0.364763085102832	0.549	0.433	4.99113479733198e-12
PTPN22	3.4079510463044e-16	0.319655957197031	0.296	0.182	5.2697147029005e-12
G6PD	3.59479819236889e-16	0.342240104766149	0.392	0.273	5.55863644486001e-12
RAB5IF	3.6990440126926e-16	0.325300105202605	0.488	0.354	5.71983175682656e-12
SELENOM	3.88911124400914e-16	-0.333254869724312	0.118	0.241	6.01373271661133e-12
YWHAQ	3.91588569035422e-16	0.320169277846215	0.681	0.579	6.05513404299474e-12
ADGRE5	4.145747960176e-16	0.323326571012181	0.614	0.486	6.41057007082015e-12
WDR1	4.60848113633945e-16	0.330492411815469	0.679	0.557	7.12609438112169e-12
STARD3NL	5.1692859937434e-16	0.32162289888357	0.234	0.13	7.99326693212542e-12
SUN2	6.09808194513231e-16	0.307720368581976	0.776	0.682	9.4294641117581e-12
IGF2R	7.81073839357543e-16	0.312126913686548	0.263	0.153	1.20777447779857e-11
CD53	8.29404466590105e-16	0.314777027523142	0.714	0.625	1.28250812668828e-11
UCP2	9.03497775104058e-16	0.306233822812946	0.707	0.601	1.3970786096434e-11
LAG3	9.81373487064012e-16	0.333838789821551	0.459	0.336	1.51749782304708e-11
PYHIN1	1.02122242374665e-15	0.340339955816355	0.531	0.402	1.57911623383944e-11
RAC1	1.04900076293075e-15	0.32276460803613	0.59	0.471	1.62206987971982e-11
MAPRE2	1.4777470148078e-15	0.325142948791606	0.335	0.219	2.2850402089973e-11
DYNLL1	1.82967513498944e-15	0.333561758418051	0.352	0.235	2.82922666123416e-11
ARHGAP15	2.20234943499463e-15	-0.358056555146807	0.369	0.508	3.40549293133219e-11
SHISA5	2.35998151734897e-15	0.304721595430304	0.696	0.579	3.64923942027671e-11
CDC42EP3	2.46743531922057e-15	0.317863018151612	0.293	0.181	3.81539523411077e-11
BLOC1S1	3.30629225418737e-15	0.306466780071964	0.588	0.468	5.11251971264994e-11
S100A11	4.56699546922066e-15	0.353875800134041	0.551	0.443	7.06194509405591e-11
CD44	5.19089416346522e-15	-0.314032475139964	0.635	0.736	8.02667964496627e-11
RPS6KA1	6.20430714575477e-15	0.316520049763836	0.397	0.28	9.59372013948060e-11
PIM2	6.92000103905305e-15	-0.348145528661826	0.217	0.349	1.07003976066877e-10
LAT	7.03351951447791e-15	-0.308929454888236	0.574	0.691	1.08759312252372e-10
PTPN7	8.40292161681932e-15	0.322632412357942	0.42	0.301	1.29934376960877e-10
NOSIP	1.00115517703219e-14	-0.514792001293391	0.333	0.444	1.54808625024488e-10
MGAT4A	1.19500088825686e-14	-0.333936764516819	0.563	0.668	1.84782987351158e-10
TSEN54	1.49040642352823e-14	0.330193535998304	0.48	0.36	2.3046154527017e-10
BRD2	2.65939065623706e-14	0.312336555984673	0.615	0.509	4.11221577173937e-10
BSG	2.67024290151671e-14	0.305011721564122	0.643	0.553	4.12899659861528e-10
ARHGAP9	2.92447851636798e-14	0.328045111712987	0.585	0.475	4.52212112985981e-10
PDE4B	3.02394979444996e-14	-0.338561306758825	0.249	0.382	4.67593356715798e-10
GLIPR1	3.69906180299215e-14	0.336380138365198	0.472	0.352	5.71985926596677e-10
BTG2	4.08379263575134e-14	-0.302248898558747	0.321	0.462	6.3147685526623e-10
CD164	4.19587826071167e-14	0.30746975193731	0.508	0.404	6.48808655453845e-10
CD2BP2	5.0580849055557e-14	0.31614263942719	0.318	0.211	7.82131668946078e-10
AC007952.4	8.7545977392372e-14	0.410363480046303	0.394	0.279	1.35372344841825e-09
TRBC1	1.58952472544686e-13	0.376322555269422	0.569	0.472	2.45788208295848e-09
TCIRG1	1.80982770959899e-13	0.310022146890721	0.566	0.466	2.79853658735291e-09
CDKN2D	1.97808481050512e-13	0.371201586243018	0.32	0.218	3.05871254248406e-09
CCDC69	2.12411834906687e-13	0.326002838808613	0.426	0.322	3.2845242031621e-09
RELB	3.71063651877022e-13	-0.302894176854666	0.178	0.298	5.7377572489744e-09
PXN	4.77627465697009e-13	0.305186240309544	0.479	0.375	7.38555350207285e-09
BIRC3	5.66688278763411e-13	-0.331480441800481	0.187	0.306	8.76270085451863e-09
TGFB1	7.0447994881061e-13	0.317935660403907	0.568	0.477	1.08933734484585e-08
MTPN	9.18745507870739e-13	0.309182227426836	0.431	0.321	1.42065617882052e-08
ITM2A	9.64939683432461e-13	-0.35853049130144	0.479	0.603	1.49208623249161e-08
TRGV9	1.15318605901386e-12	0.555319012411342	0.12	0.054	1.78317160305313e-08
CD55	1.22769044455385e-12	-0.304629760864828	0.239	0.363	1.89837773441362e-08
GPI	1.31832886640557e-12	0.317003390597981	0.568	0.471	2.03853192612293e-08
RNF166	1.56034502269552e-12	0.330781348681713	0.554	0.465	2.41276150859409e-08
TLN1	2.68609806005693e-12	0.321655150297117	0.517	0.416	4.15351343026603e-08
ITGB2-AS1	3.543348030648e-12	-0.304438028058748	0.265	0.385	5.47907905979101e-08
ARF6	3.83075862748768e-12	0.307682775344429	0.472	0.37	5.92350206568421e-08
GPR65	4.24355527178281e-12	0.334214419707261	0.452	0.36	6.56180951675775e-08
SLC2A3	6.15410568327853e-12	-0.356147004480469	0.358	0.472	9.51609361805359e-08
PMAIP1	7.69731680710722e-12	-0.330865705301632	0.127	0.229	1.19023609788299e-07
PLP2	4.85017752457863e-11	-0.331753789826129	0.329	0.436	7.49982950625594e-07
CD74	2.08575130994832e-10	-0.394530426144918	0.965	0.97	3.22519725057308e-06
STAT1	6.61089014161059e-10	-0.396116623454371	0.384	0.482	1.02224194259725e-05
TOB1	9.87384808929894e-09	-0.323931334986357	0.184	0.27	0.000152679313004829
